# Supplementary material for: Analysis and Projections of the Global Burden of Anxiety, Depression, Bipolar Disorder, and Schizophrenia Among Women of Reproductive Age (1990–2021)
Source: Research Square preprint supplement (doi:10.21203/rs.3.rs-7970352/v1), 2026-01-08
Supplement: Supplementary file 1 [file 1e593eb6b82c1836f34a70c7.docx]

Table 1 The incidence cases and age-standardized incidence rate of anxiety disorders disease in 1990 and 2021, along with their temporal trend.

|  | Rate per 100 000(95%UI) | | 2021 | | 1990-2021 |
| --- | --- | --- | --- | --- | --- |
| 1990 | |  | |  |
| Incidence cases | The age-standardized incidence rate | Incidence cases | The age-standardized incidence rate | EAPC |

| **Global** | 10728548 (7058385 to 14938651) | 797.81 (527.95 to 1108.31) | 18962131 (12660029 to 26295396) | 976.14 (650.09 to 1355.11) | 0.24 (0.08 to 0.39) |
| --- | --- | --- | --- | --- | --- |
| **SDI region** |  |  |  |  |  |
| High SDI | 2135047 (1432423 to 2971475) | 948.44 (635.2 to 1320.95) | 2853074 (1899052 to 3973078) | 1218.56 (806.6 to 1696.8) | 0.28 (0.09 to 0.46) |
| High-middle SDI | 2129500 (1403378 to 2983302) | 763.79 (505.13 to 1068.56) | 2737964 (1803315 to 3843299) | 924.49 (600.29 to 1305.46) | 0.08 (-0.09 to 0.25) |
| Middle SDI | 3529827 (2308097 to 4896476) | 786.68 (520.36 to 1086.36) | 6204189 (4143079 to 8539181) | 1010.08 (670.08 to 1393.73) | 0.34 (0.18 to 0.51) |
| Low-middle SDI | 2100995 (1382205 to 2930806) | 769.57 (510.29 to 1068.67) | 4814788 (3223652 to 6659907) | 949.69 (637.84 to 1312.17) | 0.41 (0.26 to 0.56) |
| Low SDI | 822937 (530429 to 1170280) | 728.7 (475.17 to 1031.36) | 2336119 (1518389 to 3297914) | 841.34 (553.46 to 1182.79) | 0.19 (0.07 to 0.32) |
| **GBD region** |  |  |  |  |  |
| Andean Latin America | 104609 (64381 to 154429) | 1088.67 (676.77 to 1599.44) | 269514 (161062 to 409142) | 1543.39 (921.02 to 2343.89) | 0.44 (0.14 to 0.74) |
| Australasia | 62989 (39165 to 91645) | 1178.99 (730.54 to 1716.7) | 91094 (55171 to 135833) | 1308.88 (788.4 to 1954.57) | 0.25 (0.13 to 0.38) |
| Caribbean | 88536 (55517 to 128306) | 947.17 (598.11 to 1366.17) | 140334 (88145 to 208576) | 1169.28 (732.93 to 1739.96) | 0.24 (0.09 to 0.4) |
| Central Asia | 83455 (51961 to 120817) | 494.98 (308.72 to 714.6) | 148239 (92314 to 217621) | 612.93 (379.18 to 904.01) | 0.19 (0.02 to 0.35) |
| Central Europe | 225279 (146931 to 321264) | 733.12 (476.79 to 1047.11) | 252984 (165661 to 358878) | 1001.24 (647.65 to 1429.92) | 0.31 (0.08 to 0.53) |
| Central Latin America | 334381 (214670 to 472080) | 793.53 (515.47 to 1114.68) | 776238 (505479 to 1088452) | 1141.19 (742.81 to 1600.72) | 0.74 (0.53 to 0.95) |
| Central Sub-Saharan Africa | 92717 (56706 to 137694) | 739.56 (455.95 to 1090.15) | 273421 (163102 to 417667) | 824.55 (493.33 to 1255.53) | 0.14 (0.03 to 0.25) |
| East Asia | 2295505 (1494840 to 3206710) | 687.33 (453.65 to 954.73) | 2312917 (1556700 to 3211205) | 704.81 (465.63 to 985.62) | -0.53 (-0.69 to -0.37) |
| Eastern Europe | 396215 (264350 to 547754) | 721.42 (477.82 to 999.85) | 462974 (310102 to 634514) | 1003.54 (664.25 to 1383.18) | 0.32 (0.08 to 0.55) |
| Eastern Sub-Saharan Africa | 363103 (231266 to 514198) | 820.93 (529.06 to 1157.75) | 1057053 (674589 to 1500615) | 963.86 (623.05 to 1361.54) | 0.11 (-0.03 to 0.24) |
| High-income Asia Pacific | 296798 (193791 to 412287) | 652.89 (426.19 to 907.51) | 285336 (187416 to 399116) | 775.34 (505.43 to 1085.75) | -0.16 (-0.33 to 0) |
| High-income North America | 874484 (603133 to 1194303) | 1181.68 (811.78 to 1615.36) | 1296755 (870228 to 1790275) | 1576.93 (1055.1 to 2175.1) | 0.29 (0.02 to 0.56) |
| North Africa and Middle East | 770067 (493743 to 1115136) | 954.55 (618.48 to 1377) | 1820024 (1135627 to 2695730) | 1146.18 (714.54 to 1698.15) | 0.45 (0.3 to 0.6) |
| Oceania | 12020 (7446 to 17683) | 767.11 (479.13 to 1121.36) | 29960 (18001 to 45819) | 858.74 (517.15 to 1311.02) | 0.12 (0.04 to 0.2) |
| South Asia | 1848991 (1230669 to 2539891) | 729.75 (489.22 to 999.65) | 4459968 (3040346 to 6039337) | 903.5 (616.96 to 1222.77) | 0.44 (0.26 to 0.62) |
| Southeast Asia | 948880 (619385 to 1323116) | 789.29 (519.05 to 1096.93) | 1849098 (1232332 to 2566238) | 1012.28 (672.67 to 1406.43) | 0.28 (0.1 to 0.45) |
| Southern Latin America | 132381 (86387 to 189926) | 1061.65 (693.63 to 1522.73) | 228331 (136197 to 344501) | 1329.58 (792.3 to 2007.36) | 0.16 (-0.02 to 0.34) |
| Southern Sub-Saharan Africa | 102575 (66222 to 143736) | 768.44 (502.15 to 1070.42) | 221230 (144908 to 309387) | 1015.64 (664.21 to 1421.63) | 0.26 (0.06 to 0.46) |
| Tropical Latin America | 482618 (315467 to 668967) | 1207.11 (793.75 to 1670.2) | 1111559 (737246 to 1565120) | 1851.05 (1223.06 to 2604.6) | 1.08 (0.76 to 1.4) |
| Western Europe | 957600 (612529 to 1390417) | 1016.1 (650.54 to 1473.56) | 1115696 (715206 to 1601914) | 1249.18 (795.33 to 1795.92) | 0.35 (0.21 to 0.5) |
| Western Sub-Saharan Africa | 255344 (163413 to 361679) | 573.1 (371.64 to 808.27) | 759407 (488449 to 1073860) | 621.15 (403.37 to 876.82) | 0.18 (0.04 to 0.33) |

Abbreviations: EAPC, estimated annual percentage change, SDl, Sociodemographic Index; Ul,uncertainty interval. “ EAPC is expressed as 95% CIs.

Table 2 The DALYs cases and age-standardized DALYs rate of anxiety disorders disease in 1990 and 2021, along with their temporal trend.

|  | Rate per 100 000(95%UI) | | 2021 | | 1990-2021 |
| --- | --- | --- | --- | --- | --- |
| 1990 | |  | |  |
| DALYs cases | The age-standardized DALYs rate | DALYs cases | The age-standardized DALYs rate | EAPC |

| **Global** | 9328956 (5917676 to 13620685) | 698.3 (442.6 to 1018.65) | 16448344 (10383333 to 24009992) | 844.05 (532.79 to 1232.57) | 0.16 (0.01 to 0.32) |
| --- | --- | --- | --- | --- | --- |
| **SDI region** |  |  |  |  |  |
| High SDI | 2043455 (1301043 to 2990142) | 900.03 (572.56 to 1317.41) | 2745188 (1743682 to 4004979) | 1140.64 (724.95 to 1666.29) | 0.14 (-0.08 to 0.35) |
| High-middle SDI | 1927404 (1227564 to 2806442) | 692.52 (440.41 to 1008.29) | 2487171 (1551501 to 3657646) | 835.89 (521.28 to 1232.17) | 0.07 (-0.1 to 0.23) |
| Middle SDI | 3024602 (1926600 to 4410929) | 675.54 (429.85 to 983.78) | 5417644 (3456898 to 7877801) | 877.44 (559.52 to 1276.98) | 0.36 (0.19 to 0.52) |
| Low-middle SDI | 1664857 (1044787 to 2443621) | 617.24 (387.16 to 904.27) | 3896043 (2458016 to 5672689) | 771.79 (486.96 to 1122.66) | 0.46 (0.32 to 0.6) |
| Low SDI | 659781 (411510 to 983257) | 591.7 (369.02 to 880.6) | 1888211 (1162549 to 2819269) | 686.86 (422.94 to 1024.05) | 0.22 (0.1 to 0.34) |
| **GBD region** |  |  |  |  |  |
| Andean Latin America | 96613 (57712 to 147281) | 1028.17 (614.34 to 1567) | 253659 (149262 to 395132) | 1449.82 (853.42 to 2256.86) | 0.45 (0.16 to 0.74) |
| Australasia | 65972 (40727 to 99527) | 1226.54 (756.38 to 1851.6) | 96214 (57071 to 148232) | 1331.41 (790.19 to 2050) | 0.24 (0.14 to 0.33) |
| Caribbean | 76856 (45799 to 118118) | 829.26 (493.92 to 1271.04) | 123221 (73950 to 188783) | 1023.85 (614.13 to 1569) | 0.25 (0.1 to 0.4) |
| Central Asia | 64797 (38189 to 99708) | 384.94 (226.32 to 592.5) | 115505 (67532 to 179181) | 477.48 (278.81 to 741.09) | 0.19 (0.02 to 0.36) |
| Central Europe | 187798 (115483 to 281746) | 610.93 (375.26 to 918.47) | 211608 (130502 to 317266) | 829.55 (511.7 to 1244.04) | 0.3 (0.08 to 0.52) |
| Central Latin America | 278259 (172888 to 411442) | 664.85 (412.96 to 981.57) | 658936 (407957 to 984002) | 967.11 (599.01 to 1444.37) | 0.72 (0.48 to 0.97) |
| Central Sub-Saharan Africa | 76381 (45808 to 117479) | 614.13 (368.37 to 940.98) | 225913 (131912 to 360784) | 685.83 (400.83 to 1093.44) | 0.17 (0.06 to 0.27) |
| East Asia | 2011893 (1291935 to 2941224) | 596.53 (382.41 to 871.85) | 1992595 (1262971 to 2950597) | 616.8 (390.72 to 913.98) | -0.53 (-0.7 to -0.37) |
| Eastern Europe | 331368 (214027 to 485124) | 600.47 (386.95 to 879.93) | 386537 (246701 to 563962) | 829.05 (528.46 to 1214.66) | 0.32 (0.09 to 0.55) |
| Eastern Sub-Saharan Africa | 291169 (181267 to 433062) | 677.93 (421.77 to 1006.24) | 847625 (525221 to 1283511) | 790.95 (489.83 to 1193.93) | 0.12 (-0.02 to 0.25) |
| High-income Asia Pacific | 249111 (157076 to 367725) | 547.21 (345.53 to 808.62) | 241960 (150489 to 363236) | 649.35 (405.91 to 973.4) | -0.11 (-0.28 to 0.05) |
| High-income North America | 802494 (522068 to 1154699) | 1060.44 (688.74 to 1526.44) | 1196413 (775406 to 1736433) | 1414.22 (916.57 to 2054.75) | 0.15 (-0.2 to 0.51) |
| North Africa and Middle East | 773967 (485447 to 1138638) | 966.97 (607.2 to 1420.87) | 1882833 (1142662 to 2817198) | 1183.83 (718.06 to 1772.49) | 0.37 (0.24 to 0.5) |
| Oceania | 10349 (6231 to 15969) | 658.88 (395.98 to 1014.17) | 25991 (14566 to 41937) | 744.76 (417.71 to 1200.08) | 0.13 (0.05 to 0.2) |
| South Asia | 1357075 (861459 to 1974664) | 544.66 (345.95 to 790.85) | 3273256 (2109051 to 4705742) | 665.93 (429.4 to 956.5) | 0.45 (0.26 to 0.64) |
| Southeast Asia | 746044 (470314 to 1100271) | 626.6 (394.12 to 922.7) | 1485464 (934317 to 2202813) | 810.68 (510.29 to 1202.37) | 0.29 (0.12 to 0.46) |
| Southern Latin America | 139173 (88869 to 204582) | 1123.82 (717.37 to 1651.88) | 240552 (139628 to 365818) | 1381.49 (802.14 to 2101.38) | 0.03 (-0.18 to 0.24) |
| Southern Sub-Saharan Africa | 84034 (53387 to 123078) | 633.35 (401.81 to 925.12) | 181302 (116407 to 263722) | 833.78 (534.76 to 1213.06) | 0.24 (0.04 to 0.44) |
| Tropical Latin America | 436030 (282337 to 624903) | 1105.86 (716.24 to 1584.31) | 1146277 (734480 to 1642912) | 1874.23 (1199.81 to 2688.52) | 1.4 (0.88 to 1.93) |
| Western Europe | 1031704 (638828 to 1533835) | 1087.27 (673.49 to 1616.79) | 1209541 (749486 to 1785519) | 1333.41 (827.15 to 1967.63) | 0.27 (0.11 to 0.43) |
| Western Sub-Saharan Africa | 217869 (136174 to 325874) | 484.48 (302.7 to 723.7) | 652943 (405725 to 977339) | 529.25 (328.86 to 791.21) | 0.2 (0.09 to 0.31) |

Abbreviations: EAPC, estimated annual percentage change, SDl, Sociodemographic Index; Ul,uncertainty interval. “ EAPC is expressed as 95% CIs.

Table 3 The incidence cases and age-standardized incidence rate of depressive disorders disease in 1990 and 2021, along with their temporal trend.

|  | Rate per 100 000(95%UI) | | 2021 | | 1990-2021 |
| --- | --- | --- | --- | --- | --- |
| 1990 | |  | |  |
| Incidence cases | The age-standardized incidence rate | Incidence cases | The age-standardized incidence rate | EAPC |

| **Global** | 77722841 (58860491 to 102539344) | 5898.5 (4486.52 to 7740.66) | 133248593 (99032450 to 177876463) | 6808.01 (5049.99 to 9106.66) | -0.18 (-0.39 to 0.04) |
| --- | --- | --- | --- | --- | --- |
| **SDI region** |  |  |  |  |  |
| High SDI | 14095700 (11172406 to 17813539) | 6219.44 (4915.78 to 7869.11) | 21662488 (16621406 to 28113424) | 9099.46 (6930.43 to 11859.63) | 0.54 (0.31 to 0.77) |
| High-middle SDI | 14966527 (11469344 to 19395257) | 5424.7 (4166.97 to 7008.76) | 17857233 (13115937 to 23816969) | 5778.86 (4201.28 to 7786.22) | -0.33 (-0.57 to -0.09) |
| Middle SDI | 22649073 (16997951 to 29922163) | 5183.69 (3915.67 to 6798.65) | 36081478 (26891514 to 47657463) | 5767.56 (4281.65 to 7652.92) | -0.25 (-0.48 to -0.01) |
| Low-middle SDI | 18391509 (13457053 to 25013203) | 7035.36 (5182.88 to 9485.43) | 37747940 (27469874 to 51290417) | 7551.4 (5510.78 to 10222.82) | -0.6 (-0.86 to -0.34) |
| Low SDI | 7553850 (5354318 to 10472429) | 7097.66 (5079.82 to 9744.65) | 19801185 (13890117 to 27443214) | 7509.35 (5325.8 to 10306.14) | -0.36 (-0.53 to -0.19) |
| **GBD region** |  |  |  |  |  |
| Andean Latin America | 438667 (303751 to 617425) | 4737 (3296.37 to 6625.44) | 1105337 (751097 to 1589967) | 6320.57 (4292.05 to 9087.82) | 0.06 (-0.33 to 0.45) |
| Australasia | 480002 (369325 to 616432) | 8977.64 (6898.68 to 11536.06) | 723160 (498995 to 1010531) | 10269.64 (7057.12 to 14369.31) | 0.24 (0.08 to 0.41) |
| Caribbean | 708019 (507841 to 969849) | 7697.77 (5552.01 to 10488.7) | 969573 (658741 to 1384728) | 8029.7 (5444.45 to 11483.95) | -0.5 (-0.76 to -0.24) |
| Central Asia | 762529 (544489 to 1049479) | 4676.28 (3367.02 to 6381.95) | 1367571 (948058 to 1922301) | 5623.36 (3891.23 to 7918.02) | 0.1 (-0.09 to 0.3) |
| Central Europe | 1272969 (942663 to 1698354) | 4115.36 (3043.59 to 5505.79) | 1273327 (914036 to 1725195) | 4795.85 (3393.82 to 6608.56) | -0.47 (-0.8 to -0.15) |
| Central Latin America | 2056464 (1474404 to 2831110) | 5119.69 (3689.12 to 6999.46) | 5395961 (3919153 to 7296866) | 7882.55 (5720.17 to 10666.28) | 1.02 (0.8 to 1.24) |
| Central Sub-Saharan Africa | 1276623 (879908 to 1821332) | 10640.71 (7408.07 to 15062.94) | 3584294 (2373076 to 5212807) | 11270.02 (7523.17 to 16274.56) | -0.02 (-0.13 to 0.1) |
| East Asia | 14573702 (11063941 to 19051300) | 4412.52 (3367.36 to 5732.14) | 10395449 (7909206 to 13367181) | 2956.12 (2227.57 to 3840.52) | -1.4 (-1.65 to -1.16) |
| Eastern Europe | 3022733 (2188449 to 4091174) | 5392.25 (3903.27 to 7297.88) | 3496268 (2499383 to 4757666) | 6990.81 (4956.63 to 9586.01) | -0.13 (-0.41 to 0.15) |
| Eastern Sub-Saharan Africa | 2992873 (2132522 to 4133293) | 7375.7 (5319.95 to 10067.85) | 8187853 (5707046 to 11439404) | 7985.77 (5630.58 to 11024.96) | -0.27 (-0.43 to -0.12) |
| High-income Asia Pacific | 1741956 (1355004 to 2240796) | 3838.31 (2978.91 to 4945.44) | 1832829 (1393439 to 2364638) | 5010.7 (3763.15 to 6511.04) | 0.47 (0.27 to 0.66) |
| High-income North America | 5275313 (4101575 to 6757929) | 7145.82 (5538.1 to 9178.7) | 10479475 (8142164 to 13299662) | 12689.95 (9828.58 to 16139.08) | 0.82 (0.47 to 1.16) |
| North Africa and Middle East | 6585654 (4704056 to 9116662) | 8629.46 (6216.24 to 11853.62) | 16021220 (10983016 to 22831950) | 10032.79 (6876.71 to 14305.05) | 0.2 (0.04 to 0.36) |
| Oceania | 62234 (43091 to 88312) | 3968.59 (2766.94 to 5579.09) | 143677 (95168 to 209653) | 4125.32 (2738.85 to 6006.85) | -0.13 (-0.19 to -0.06) |
| South Asia | 17346564 (12898192 to 23184706) | 7116.76 (5321.38 to 9440.27) | 35575994 (26421845 to 47285175) | 7283.76 (5421.29 to 9654.43) | -0.99 (-1.31 to -0.66) |
| Southeast Asia | 3802109 (2781508 to 5120365) | 3196.08 (2353.81 to 4271.57) | 7017745 (5014067 to 9561434) | 3829.96 (2729.29 to 5227.5) | -0.04 (-0.26 to 0.17) |
| Southern Latin America | 868789 (655862 to 1148697) | 6983.96 (5277.99 to 9228.68) | 1401345 (1012961 to 1899048) | 8133.97 (5867.86 to 11029.02) | -0.17 (-0.43 to 0.08) |
| Southern Sub-Saharan Africa | 851742 (638669 to 1125686) | 6761.59 (5111.67 to 8866.45) | 1889699 (1403730 to 2506386) | 8722.61 (6487.11 to 11549.81) | 0.37 (0.09 to 0.64) |
| Tropical Latin America | 3243572 (2443732 to 4270770) | 8304.3 (6295.63 to 10868.09) | 6004237 (4494351 to 7859870) | 9756.89 (7276.88 to 12821.9) | -0.44 (-0.82 to -0.07) |
| Western Europe | 7776728 (6187704 to 9786383) | 8121.24 (6445.97 to 10229.83) | 9415888 (6929830 to 12706630) | 10094.71 (7338.27 to 13758.87) | 0.2 (-0.01 to 0.42) |
| Western Sub-Saharan Africa | 2583599 (1839829 to 3578085) | 6321.17 (4550.59 to 8648.31) | 6967690 (4926014 to 9745602) | 6114.54 (4369.47 to 8446.05) | -0.33 (-0.44 to -0.21) |

Abbreviations: EAPC, estimated annual percentage change, SDl, Sociodemographic Index; Ul,uncertainty interval. “ EAPC is expressed as 95% CIs.

Table 4 The DALYs cases and age-standardized DALYs rate of depressive disorders disease in 1990 and 2021, along with their temporal trend.

|  | Rate per 100 000(95%UI) | | 2021 | | 1990-2021 |
| --- | --- | --- | --- | --- | --- |
| 1990 | |  | |  |
| DALYs cases | The age-standardized DALYs rate | DALYs cases | The age-standardized DALYs rate | EAPC |

| **Global** | 12445336 (8084219 to 18023437) | 948.86 (617.06 to 1369.93) | 21042424 (13468194 to 30593481) | 1073.5 (686.73 to 1562.48) | -0.14 (-0.32 to 0.04) |
| --- | --- | --- | --- | --- | --- |
| **SDI region** |  |  |  |  |  |
| High SDI | 2291807 (1525885 to 3251697) | 1007.25 (670.08 to 1431.55) | 3350602 (2211216 to 4819019) | 1399.31 (921.2 to 2022.31) | 0.44 (0.25 to 0.64) |
| High-middle SDI | 2449324 (1601463 to 3518044) | 889.89 (582.12 to 1275.93) | 2939216 (1878568 to 4276996) | 939.53 (596.4 to 1375.97) | -0.28 (-0.48 to -0.08) |
| Middle SDI | 3677230 (2385351 to 5345046) | 850.96 (552.69 to 1231.79) | 5819959 (3723678 to 8429630) | 926.08 (591.77 to 1344.73) | -0.22 (-0.42 to -0.03) |
| Low-middle SDI | 2832462 (1799426 to 4175678) | 1088.11 (691.58 to 1595.85) | 5817166 (3674561 to 8529565) | 1164.37 (735.95 to 1704.52) | -0.49 (-0.71 to -0.27) |
| Low SDI | 1183844 (747044 to 1751936) | 1116.33 (706.66 to 1643.03) | 3099941 (1938028 to 4603046) | 1179.58 (740.73 to 1739.54) | -0.27 (-0.41 to -0.13) |
| **GBD region** |  |  |  |  |  |
| Andean Latin America | 69125 (42310 to 105173) | 751.79 (460.41 to 1140.63) | 169290 (101535 to 261073) | 966.63 (579.65 to 1490.12) | 0.06 (-0.28 to 0.39) |
| Australasia | 73943 (48093 to 106574) | 1380.17 (896.99 to 1991.52) | 110902 (68365 to 167971) | 1563.09 (962.3 to 2373.22) | 0.24 (0.09 to 0.38) |
| Caribbean | 106489 (66718 to 161464) | 1161.78 (729.68 to 1756.61) | 144581 (87039 to 222582) | 1195.95 (719.21 to 1842.41) | -0.48 (-0.72 to -0.25) |
| Central Asia | 125704 (79388 to 185289) | 772.01 (488.55 to 1132.2) | 220831 (137416 to 332913) | 903.45 (561.45 to 1363.66) | 0.1 (-0.06 to 0.26) |
| Central Europe | 215905 (137301 to 313409) | 695.87 (442.07 to 1011.41) | 211070 (132809 to 308756) | 788.38 (492.87 to 1163.38) | -0.38 (-0.64 to -0.12) |
| Central Latin America | 316373 (199590 to 471536) | 791.2 (499.51 to 1175.67) | 800325 (496086 to 1189258) | 1168.22 (724.13 to 1736.5) | 0.91 (0.71 to 1.11) |
| Central Sub-Saharan Africa | 190214 (117316 to 291338) | 1597.25 (989.08 to 2430.71) | 535682 (313866 to 827727) | 1695.2 (994.94 to 2610.73) | 0.02 (-0.07 to 0.12) |
| East Asia | 2490860 (1624451 to 3611963) | 766.37 (500.81 to 1106.86) | 2009848 (1320287 to 2848265) | 560.51 (365.8 to 799.17) | -1.15 (-1.34 to -0.95) |
| Eastern Europe | 486387 (309306 to 712816) | 864.27 (549.26 to 1266.81) | 546448 (346405 to 807155) | 1083.11 (684.77 to 1608.23) | -0.09 (-0.33 to 0.15) |
| Eastern Sub-Saharan Africa | 481183 (303359 to 708083) | 1188.39 (751.52 to 1736.98) | 1302601 (802604 to 1945053) | 1273.15 (789.45 to 1889.91) | -0.21 (-0.33 to -0.08) |
| High-income Asia Pacific | 280947 (183633 to 402273) | 618.37 (403.62 to 885.93) | 290039 (188979 to 417635) | 783.79 (508.07 to 1134.18) | 0.38 (0.2 to 0.56) |
| High-income North America | 886754 (586930 to 1271514) | 1193.29 (788.61 to 1716.28) | 1597172 (1063927 to 2290899) | 1929.21 (1284.02 to 2772.95) | 0.64 (0.36 to 0.92) |
| North Africa and Middle East | 1005848 (626768 to 1502447) | 1323.9 (828.06 to 1967.04) | 2420065 (1465303 to 3673290) | 1515.15 (916.91 to 2301.13) | 0.19 (0.05 to 0.34) |
| Oceania | 10693 (6680 to 16226) | 698.73 (437.04 to 1054.93) | 24892 (14825 to 38303) | 720.59 (430.31 to 1107.37) | -0.09 (-0.14 to -0.04) |
| South Asia | 2645823 (1692290 to 3895331) | 1088.15 (696.41 to 1593.93) | 5462958 (3482818 to 7949804) | 1118.19 (713.21 to 1625.21) | -0.82 (-1.1 to -0.54) |
| Southeast Asia | 692004 (446214 to 1012842) | 593.89 (383.57 to 865.93) | 1260592 (802918 to 1855937) | 683.77 (434.95 to 1007.98) | -0.01 (-0.17 to 0.15) |
| Southern Latin America | 132096 (85584 to 194500) | 1063.1 (688.88 to 1563.55) | 210975 (131446 to 313050) | 1221.46 (760.65 to 1814.09) | -0.2 (-0.44 to 0.05) |
| Southern Sub-Saharan Africa | 135540 (88225 to 197114) | 1080.34 (703.43 to 1562.11) | 288124 (185614 to 421681) | 1329.3 (856.5 to 1943.43) | 0.28 (0.04 to 0.52) |
| Tropical Latin America | 477478 (309004 to 697269) | 1225.46 (794.24 to 1783.06) | 876601 (555830 to 1277429) | 1419.51 (900.1 to 2073.83) | -0.41 (-0.75 to -0.06) |
| Western Europe | 1207940 (802909 to 1707060) | 1258.72 (836.26 to 1781.26) | 1429185 (913491 to 2114351) | 1527.48 (969.93 to 2272.7) | 0.18 (-0.02 to 0.37) |
| Western Sub-Saharan Africa | 414027 (258812 to 611944) | 1017.39 (639.5 to 1494.49) | 1130242 (707465 to 1676792) | 996.09 (626.15 to 1467.43) | -0.24 (-0.33 to -0.14) |

Abbreviations: EAPC, estimated annual percentage change, SDl, Sociodemographic Index; Ul,uncertainty interval. “ EAPC is expressed as 95% CIs.

Table 5 The incidence cases and age-standardized incidence rate of Bipolar disorder disease in 1990 and 2021, along with their temporal trend.

|  | Rate per 100 000(95%UI) | | 2021 | | 1990-2021 |
| --- | --- | --- | --- | --- | --- |
| 1990 | |  | |  |
| Incidence cases | The age-standardized incidence rate | Incidence cases | The age-standardized incidence rate | EAPC |

| **Global** | 575625 (344082 to 875035) | 41.64 (24.69 to 63.45) | 826397 (484408 to 1270443) | 43.16 (25.43 to 66.23) | 0.09 (0.07 to 0.11) |
| --- | --- | --- | --- | --- | --- |
| **SDI region** |  |  |  |  |  |
| High SDI | 122166 (77076 to 179264) | 56.43 (36.24 to 82.11) | 127979 (81132 to 187291) | 57.29 (37.47 to 82.78) | 0.07 (0.05 to 0.09) |
| High-middle SDI | 103636 (59717 to 161399) | 37.22 (21.48 to 57.83) | 107786 (60502 to 169743) | 38.88 (22.39 to 60.79) | 0.1 (0.03 to 0.18) |
| Middle SDI | 177098 (106839 to 269544) | 37.17 (22.04 to 56.91) | 243395 (142322 to 374670) | 41.13 (24.37 to 63) | 0.26 (0.22 to 0.3) |
| Low-middle SDI | 117716 (69184 to 181683) | 40.54 (23.38 to 62.94) | 210928 (121371 to 328059) | 41.06 (23.54 to 63.88) | 0.02 (0.01 to 0.03) |
| Low SDI | 54319 (31049 to 85052) | 45.4 (25.48 to 71.53) | 135497 (77503 to 212314) | 46.12 (25.89 to 72.74) | 0.05 (0.04 to 0.05) |
| **GBD region** |  |  |  |  |  |
| Andean Latin America | 8032 (4472 to 13025) | 76.94 (42.13 to 125.6) | 13139 (7136 to 21571) | 76.95 (42.16 to 125.71) | 0 (0 to 0) |
| Australasia | 4879 (2998 to 7306) | 93.63 (58.07 to 139.58) | 6130 (3700 to 9269) | 93.74 (58.34 to 139.78) | 0.01 (0 to 0.01) |
| Caribbean | 7684 (4270 to 12426) | 77.3 (42.53 to 125.32) | 9079 (4933 to 14791) | 77.31 (42.25 to 125.57) | 0 (0 to 0) |
| Central Asia | 7855 (4201 to 12921) | 45.76 (24.38 to 75.05) | 10676 (5628 to 17580) | 45.8 (24.36 to 75.01) | 0 (0 to 0) |
| Central Europe | 14989 (8411 to 23835) | 49.65 (28.05 to 78.81) | 11866 (6544 to 18856) | 49.53 (28.01 to 78.4) | -0.01 (-0.01 to -0.01) |
| Central Latin America | 36259 (22289 to 54247) | 77.85 (46.66 to 117.56) | 52209 (31016 to 79187) | 77.78 (46.49 to 117.68) | -0.01 (-0.01 to 0) |
| Central Sub-Saharan Africa | 6429 (3480 to 10541) | 48.59 (25.94 to 80) | 16936 (9173 to 27741) | 48.59 (25.96 to 79.95) | 0 (0 to 0) |
| East Asia | 57465 (33907 to 87569) | 16.65 (9.75 to 25.4) | 50533 (28838 to 77652) | 16.6 (9.76 to 25.27) | -0.02 (-0.03 to -0.01) |
| Eastern Europe | 24875 (14324 to 38020) | 46.97 (27.45 to 71.23) | 20779 (11800 to 31808) | 46.95 (27.47 to 71.11) | 0 (0 to 0) |
| Eastern Sub-Saharan Africa | 25498 (14677 to 39661) | 54.16 (30.42 to 84.94) | 62648 (35945 to 97534) | 54.17 (30.44 to 84.94) | 0 (0 to 0) |
| High-income Asia Pacific | 21879 (12697 to 33653) | 48.22 (28.07 to 74.23) | 17162 (9667 to 26691) | 48.43 (28.08 to 74.82) | 0.01 (0 to 0.01) |
| High-income North America | 37251 (26563 to 48660) | 53.44 (39.13 to 68.87) | 42434 (30962 to 55088) | 52.9 (39.24 to 68.07) | 0.06 (0.04 to 0.08) |
| North Africa and Middle East | 58208 (33895 to 92517) | 67.28 (38.18 to 107.74) | 105578 (59400 to 169849) | 67.09 (37.91 to 107.78) | -0.01 (-0.02 to 0) |
| Oceania | 423 (222 to 699) | 26.04 (13.53 to 43.06) | 915 (475 to 1517) | 26.08 (13.52 to 43.16) | 0 (0 to 0) |
| South Asia | 79452 (46713 to 121118) | 30.24 (17.55 to 46.33) | 150377 (87408 to 230646) | 30.32 (17.62 to 46.49) | 0.01 (0.01 to 0.01) |
| Southeast Asia | 38736 (21965 to 60194) | 31.1 (17.43 to 48.49) | 56258 (31469 to 87671) | 31.17 (17.54 to 48.46) | 0 (0 to 0) |
| Southern Latin America | 8774 (4734 to 14305) | 69.5 (37.32 to 113.45) | 11710 (6169 to 19309) | 69.73 (37.15 to 114.59) | 0.01 (0.01 to 0.01) |
| Southern Sub-Saharan Africa | 6952 (4101 to 10536) | 49.08 (28.36 to 74.9) | 10565 (6064 to 16176) | 49.03 (28.2 to 74.9) | 0 (0 to 0) |
| Tropical Latin America | 41003 (25915 to 60082) | 95.8 (59.56 to 141.5) | 53544 (32338 to 80380) | 95.7 (59.41 to 141.64) | 0 (0 to 0) |
| Western Europe | 67452 (39187 to 105259) | 74.11 (43.92 to 114.65) | 64927 (37445 to 101246) | 75.3 (44.57 to 116.45) | 0.07 (0.06 to 0.08) |
| Western Sub-Saharan Africa | 21531 (12381 to 33344) | 45.89 (25.77 to 71.67) | 58930 (33877 to 91119) | 45.9 (25.8 to 71.59) | 0 (0 to 0) |

Abbreviations: EAPC, estimated annual percentage change, SDl, Sociodemographic Index; Ul,uncertainty interval. “ EAPC is expressed as 95% CIs.

Table 6 The DALYs cases and age-standardized DALYs rate of Bipolar disorder disease in 1990 and 2021, along with their temporal trend.

|  | Rate per 100 000(95%UI) | | 2021 | | 1990-2021 |
| --- | --- | --- | --- | --- | --- |
| 1990 | |  | |  |
| DALYs cases | The age-standardized DALYs rate | DALYs cases | The age-standardized DALYs rate | EAPC |

| **Global** | 1890347 (1181247 to 2850106) | 142.3 (88.88 to 214.07) | 2806894 (1740129 to 4226051) | 143.77 (89.11 to 216.63) | 0.03 (0.02 to 0.04) |
| --- | --- | --- | --- | --- | --- |
| **SDI region** |  |  |  |  |  |
| High SDI | 476243 (304074 to 701694) | 209.57 (133.75 to 309.08) | 508105 (324844 to 747828) | 209.74 (134.33 to 309.17) | -0.01 (-0.03 to 0.01) |
| High-middle SDI | 352148 (215010 to 536387) | 127.35 (77.68 to 193.81) | 397619 (241487 to 605343) | 130.1 (78.73 to 199.51) | 0.05 (0 to 0.1) |
| Middle SDI | 563348 (350870 to 850162) | 126.54 (78.75 to 190.39) | 856066 (531423 to 1286754) | 138.24 (85.78 to 208.03) | 0.26 (0.24 to 0.28) |
| Low-middle SDI | 344110 (211221 to 528752) | 127.42 (78.29 to 194.83) | 657159 (401179 to 1006754) | 130.21 (79.49 to 199.18) | 0.09 (0.07 to 0.1) |
| Low SDI | 152185 (90539 to 237235) | 138.56 (82.7 to 214.57) | 385068 (229419 to 600144) | 142.77 (85.35 to 221.17) | 0.1 (0.1 to 0.11) |
| **GBD region** |  |  |  |  |  |
| Andean Latin America | 26888 (15171 to 43335) | 282.14 (160.13 to 451.63) | 49363 (28351 to 78745) | 281.66 (161.72 to 449.59) | 0.01 (0 to 0.02) |
| Australasia | 19999 (12448 to 30672) | 372.74 (231.69 to 572.69) | 26654 (16555 to 40578) | 371.1 (229.26 to 568.49) | -0.03 (-0.04 to -0.02) |
| Caribbean | 26513 (15282 to 41812) | 282.86 (163.6 to 443.88) | 33738 (19623 to 53188) | 280.14 (162.76 to 442.11) | -0.02 (-0.03 to -0.01) |
| Central Asia | 23978 (13317 to 38414) | 144.43 (80.74 to 229.72) | 35341 (19631 to 56570) | 144.18 (79.93 to 231.49) | 0 (0 to 0.01) |
| Central Europe | 49820 (29752 to 76785) | 161.57 (96.34 to 249.34) | 42410 (25359 to 65013) | 160.96 (96.05 to 248.21) | 0 (-0.01 to 0) |
| Central Latin America | 120167 (74864 to 181326) | 284.61 (177.36 to 427.92) | 193702 (119606 to 290723) | 283.94 (175.27 to 426.36) | -0.01 (-0.01 to 0) |
| Central Sub-Saharan Africa | 17957 (9757 to 29430) | 148.37 (81.66 to 241.19) | 48153 (26542 to 78759) | 150.49 (83.54 to 244.45) | 0.04 (0.04 to 0.05) |
| East Asia | 182018 (112814 to 279614) | 55.07 (34.16 to 84.45) | 185766 (114795 to 284101) | 55.04 (33.98 to 84.44) | 0.01 (0 to 0.01) |
| Eastern Europe | 81167 (50296 to 123134) | 144.92 (89.63 to 220.32) | 71637 (44433 to 107751) | 144.71 (89.54 to 218.93) | 0.01 (0.01 to 0.01) |
| Eastern Sub-Saharan Africa | 71630 (42805 to 111553) | 169.77 (101.61 to 262.27) | 179442 (106912 to 279283) | 170.81 (102.12 to 264.19) | 0.04 (0.03 to 0.04) |
| High-income Asia Pacific | 74724 (46027 to 114661) | 162.78 (100.3 to 250.32) | 62715 (38368 to 95593) | 160.61 (98.63 to 246.17) | -0.05 (-0.06 to -0.05) |
| High-income North America | 148732 (96947 to 214524) | 200.98 (130.89 to 290.01) | 164702 (107235 to 236941) | 197.04 (128.19 to 283.58) | -0.04 (-0.05 to -0.03) |
| North Africa and Middle East | 190541 (113362 to 295985) | 242.54 (144.49 to 374.22) | 386391 (230734 to 597119) | 242.63 (144.72 to 375.36) | 0.01 (0 to 0.01) |
| Oceania | 1153 (601 to 1960) | 76.21 (40.18 to 128.37) | 2637 (1369 to 4481) | 76.56 (39.96 to 129.61) | 0.01 (0.01 to 0.02) |
| South Asia | 212741 (131193 to 325527) | 85.58 (52.78 to 130.56) | 423922 (257549 to 645982) | 86.22 (52.37 to 131.31) | 0.04 (0.03 to 0.04) |
| Southeast Asia | 109381 (64957 to 170364) | 93.27 (55.41 to 144.49) | 172630 (102960 to 265692) | 93.38 (55.66 to 143.96) | 0.02 (0.01 to 0.02) |
| Southern Latin America | 30554 (17234 to 48638) | 247.09 (139.54 to 392.83) | 42591 (23866 to 67882) | 242.96 (135.85 to 388.05) | -0.06 (-0.08 to -0.05) |
| Southern Sub-Saharan Africa | 19462 (11936 to 29746) | 149.77 (92.06 to 227.76) | 32154 (19577 to 48949) | 147.94 (90.01 to 225.09) | -0.03 (-0.04 to -0.02) |
| Tropical Latin America | 149882 (94845 to 226256) | 370.63 (234.61 to 558.14) | 222218 (140784 to 331760) | 368.9 (233.33 to 551.85) | 0 (0 to 0.01) |
| Western Europe | 273939 (168310 to 415187) | 285.55 (175.17 to 433.66) | 266773 (163831 to 403802) | 286.38 (175.86 to 435.47) | 0.02 (0.02 to 0.02) |
| Western Sub-Saharan Africa | 59101 (35479 to 91899) | 139.36 (83.84 to 214.98) | 163955 (98081 to 254881) | 140.34 (84.21 to 216.98) | 0.03 (0.03 to 0.04) |

Abbreviations: EAPC, estimated annual percentage change, SDl, Sociodemographic Index; Ul,uncertainty interval. “ EAPC is expressed as 95% CIs.

Table 7 The incidence cases and age-standardized incidence rate of schizophreniadisease in 1990 and 2021, along with their temporal trend.

|  | Rate per 100 000(95%UI) | | 2021 | | 1990-2021 |
| --- | --- | --- | --- | --- | --- |
| 1990 | |  | |  |
| Incidence cases | The age-standardized incidence rate | Incidence cases | The age-standardized incidence rate | EAPC |

| **Global** | 378287 (227553 to 559592) | 26.98 (16.19 to 40.01) | 513255 (302798 to 767916) | 26.71 (15.76 to 39.94) | -0.02 (-0.03 to -0.01) |
| --- | --- | --- | --- | --- | --- |
| **SDI region** |  |  |  |  |  |
| High SDI | 62087 (37803 to 92044) | 27.76 (16.9 to 41.13) | 64248 (39289 to 94639) | 28.21 (17.26 to 41.5) | 0.09 (0.06 to 0.11) |
| High-middle SDI | 79777 (50348 to 114017) | 27.77 (17.48 to 39.78) | 80697 (49608 to 117006) | 28.81 (17.78 to 41.62) | 0.11 (0.1 to 0.13) |
| Middle SDI | 132302 (79545 to 194526) | 27.55 (16.46 to 40.73) | 159547 (93310 to 239328) | 26.7 (15.65 to 39.99) | -0.09 (-0.1 to -0.08) |
| Low-middle SDI | 72609 (41822 to 110172) | 25.01 (14.39 to 38.08) | 132003 (76447 to 200514) | 25.38 (14.69 to 38.6) | 0.05 (0.03 to 0.07) |
| Low SDI | 31214 (17710 to 47752) | 26.45 (15.05 to 40.45) | 76403 (43471 to 117297) | 26.55 (15.15 to 40.74) | 0.02 (0.01 to 0.02) |
| **GBD region** |  |  |  |  |  |
| Andean Latin America | 2157 (1140 to 3438) | 21.44 (11.36 to 34.14) | 3791 (2011 to 6134) | 21.46 (11.38 to 34.77) | 0 (-0.01 to 0.01) |
| Australasia | 1692 (1087 to 2404) | 31.83 (20.54 to 45.08) | 2205 (1433 to 3157) | 31.91 (20.96 to 45.3) | 0.01 (0 to 0.02) |
| Caribbean | 1912 (1025 to 3088) | 19.51 (10.5 to 31.48) | 2325 (1226 to 3765) | 19.42 (10.25 to 31.45) | -0.03 (-0.04 to -0.01) |
| Central Asia | 4120 (2199 to 6572) | 22.71 (12.17 to 36.21) | 5467 (2917 to 8794) | 22.65 (12.1 to 36.51) | -0.01 (-0.01 to 0) |
| Central Europe | 6823 (3820 to 10607) | 22.89 (12.81 to 35.61) | 5361 (3019 to 8235) | 23.1 (12.98 to 35.59) | 0.03 (0.02 to 0.04) |
| Central Latin America | 9963 (5654 to 15312) | 22.22 (12.6 to 34.14) | 15055 (8472 to 23176) | 22.16 (12.46 to 34.13) | -0.02 (-0.03 to -0.01) |
| Central Sub-Saharan Africa | 3400 (1838 to 5380) | 26.1 (14.2 to 41.1) | 8751 (4748 to 14001) | 25.8 (14.12 to 41.09) | -0.02 (-0.03 to -0.01) |
| East Asia | 112065 (71228 to 158701) | 31.41 (19.75 to 44.84) | 95909 (58924 to 138302) | 32.29 (20.09 to 46.12) | 0.02 (-0.01 to 0.04) |
| Eastern Europe | 11466 (6746 to 16992) | 20.91 (12.33 to 31.02) | 9358 (5426 to 14023) | 21.79 (12.71 to 32.45) | 0.19 (0.15 to 0.22) |
| Eastern Sub-Saharan Africa | 12167 (6952 to 18630) | 26.75 (15.39 to 40.85) | 29744 (16919 to 45778) | 26.51 (15.17 to 40.69) | -0.01 (-0.02 to 0) |
| High-income Asia Pacific | 12039 (6972 to 18348) | 27.05 (15.64 to 41.21) | 9786 (5679 to 14672) | 27.86 (16.08 to 41.91) | 0.22 (0.15 to 0.29) |
| High-income North America | 22705 (14153 to 32884) | 31.54 (19.77 to 45.46) | 24839 (15409 to 35946) | 31.34 (19.52 to 45.19) | -0.03 (-0.05 to -0.02) |
| North Africa and Middle East | 20939 (11550 to 32462) | 24.93 (13.78 to 38.58) | 39211 (21714 to 61431) | 24.77 (13.71 to 38.85) | -0.03 (-0.04 to -0.03) |
| Oceania | 469 (247 to 755) | 28.25 (14.99 to 45.37) | 1017 (538 to 1605) | 28.41 (15.09 to 44.84) | 0.01 (-0.01 to 0.03) |
| South Asia | 65796 (38493 to 98839) | 24.3 (14.14 to 36.73) | 125191 (73100 to 188502) | 24.72 (14.4 to 37.31) | 0.06 (0.03 to 0.09) |
| Southeast Asia | 36922 (20997 to 55906) | 28.61 (16.28 to 43.42) | 51865 (29701 to 78697) | 28.81 (16.5 to 43.71) | 0.1 (0.06 to 0.13) |
| Southern Latin America | 3406 (1829 to 5470) | 27.2 (14.64 to 43.63) | 4710 (2502 to 7544) | 27.39 (14.5 to 43.97) | 0 (-0.02 to 0.02) |
| Southern Sub-Saharan Africa | 3688 (2162 to 5493) | 26.18 (15.38 to 39.01) | 5717 (3374 to 8542) | 25.98 (15.34 to 38.86) | 0 (-0.01 to 0.01) |
| Tropical Latin America | 9377 (5515 to 13870) | 22.33 (13.11 to 33.09) | 13202 (7745 to 19618) | 22.38 (13.12 to 33.26) | 0 (-0.01 to 0.01) |
| Western Europe | 22937 (14067 to 34147) | 24.01 (14.7 to 35.79) | 21280 (12952 to 31716) | 23.66 (14.26 to 35.47) | -0.04 (-0.06 to -0.02) |
| Western Sub-Saharan Africa | 14244 (8203 to 21537) | 30.76 (17.85 to 46.4) | 38471 (22228 to 58100) | 30.63 (17.78 to 46.2) | -0.02 (-0.02 to -0.01) |

Abbreviations: EAPC, estimated annual percentage change, SDl, Sociodemographic Index; Ul,uncertainty interval. “ EAPC is expressed as 95% CIs.

Table 8 The DALYs cases and age-standardized DALYs rate of schizophreniadisease in 1990 and 2021, along with their temporal trend.

|  | Rate per 100 000(95%UI) | | 2021 | | 1990-2021 |
| --- | --- | --- | --- | --- | --- |
| 1990 | |  | |  |
| DALYs cases | The age-standardized DALYs rate | DALYs cases | The age-standardized DALYs rate | EAPC |

| **Global** | 3114984 (2138675 to 4238277) | 244.12 (168.33 to 329.91) | 4836703 (3318473 to 6567286) | 243.46 (166.79 to 331.29) | 0 (0 to 0.01) |
| --- | --- | --- | --- | --- | --- |
| **SDI region** |  |  |  |  |  |
| High SDI | 625687 (434444 to 846991) | 265.73 (184.12 to 360.7) | 696195 (485441 to 928011) | 264.42 (183.43 to 355.41) | 0.01 (-0.01 to 0.04) |
| High-middle SDI | 672326 (467381 to 898636) | 245.4 (170.92 to 327.05) | 874087 (614730 to 1154235) | 262.16 (183.06 to 349.75) | 0.19 (0.18 to 0.21) |
| Middle SDI | 1029028 (703067 to 1410514) | 247.12 (170.17 to 335.27) | 1576391 (1085696 to 2141396) | 244.76 (168.02 to 333.99) | -0.02 (-0.03 to -0.01) |
| Low-middle SDI | 564224 (380198 to 782537) | 225.05 (152.9 to 308.25) | 1134533 (765367 to 1583760) | 229.78 (155.49 to 319.34) | 0.09 (0.07 to 0.12) |
| Low SDI | 221196 (145125 to 312452) | 219.69 (146.04 to 306.07) | 552163 (364040 to 780207) | 222.41 (148.23 to 310.27) | 0.07 (0.06 to 0.08) |
| **GBD region** |  |  |  |  |  |
| Andean Latin America | 16860 (10165 to 25596) | 194.82 (119.27 to 290.55) | 34512 (20991 to 51594) | 196.14 (119.39 to 293.12) | 0.04 (0.03 to 0.05) |
| Australasia | 16151 (11008 to 21890) | 294.74 (200.5 to 400.09) | 22786 (15761 to 30509) | 293.96 (202.28 to 395.85) | 0 (-0.01 to 0.01) |
| Caribbean | 15675 (9835 to 23367) | 179.06 (113.58 to 263.89) | 21475 (13708 to 31547) | 175.9 (112.05 to 258.71) | -0.04 (-0.05 to -0.03) |
| Central Asia | 31813 (20101 to 47603) | 200.93 (128.58 to 296.31) | 50917 (32148 to 74598) | 200.69 (126.23 to 295.3) | 0.02 (0.01 to 0.04) |
| Central Europe | 65027 (42702 to 91369) | 205.08 (134.2 to 289.62) | 59564 (39572 to 82440) | 208.33 (136.66 to 292.93) | 0.06 (0.05 to 0.07) |
| Central Latin America | 76792 (50135 to 109813) | 202.02 (133.3 to 284.96) | 138687 (93391 to 195251) | 201.3 (135.46 to 283.64) | -0.01 (-0.02 to 0) |
| Central Sub-Saharan Africa | 22743 (13574 to 34385) | 205.9 (125.6 to 306.16) | 60440 (36906 to 90571) | 204.75 (127.02 to 301.9) | 0.02 (0 to 0.05) |
| East Asia | 893224 (621394 to 1197732) | 281.46 (196.96 to 374.74) | 1069773 (755348 to 1409687) | 295.9 (207.28 to 393.75) | 0.11 (0.08 to 0.13) |
| Eastern Europe | 107986 (73516 to 147464) | 186.03 (126.15 to 255.05) | 105114 (71644 to 141678) | 193.92 (130.8 to 265.36) | 0.21 (0.17 to 0.26) |
| Eastern Sub-Saharan Africa | 78930 (51044 to 113501) | 208.61 (137.18 to 295.17) | 202311 (131136 to 289608) | 211.12 (138.53 to 297.67) | 0.09 (0.07 to 0.1) |
| High-income Asia Pacific | 114729 (77400 to 158883) | 244.9 (164.58 to 341.03) | 106485 (72599 to 146142) | 249.5 (168.01 to 347.54) | 0.15 (0.1 to 0.2) |
| High-income North America | 256201 (181673 to 339040) | 327.38 (231.52 to 434.21) | 279996 (198177 to 368294) | 318.29 (224.62 to 420.46) | -0.07 (-0.1 to -0.05) |
| North Africa and Middle East | 155320 (101217 to 222271) | 219.24 (144.88 to 309.25) | 354136 (234634 to 505572) | 219.52 (145.26 to 313.92) | -0.01 (-0.01 to 0) |
| Oceania | 3418 (2084 to 5090) | 238.01 (147.47 to 349.35) | 8096 (4945 to 12207) | 238.94 (146.82 to 358.18) | 0.01 (-0.01 to 0.03) |
| South Asia | 541119 (367787 to 739711) | 228.33 (156.11 to 309.09) | 1143907 (779553 to 1568013) | 235.38 (160.72 to 321.62) | 0.13 (0.1 to 0.16) |
| Southeast Asia | 282665 (185712 to 401691) | 249.91 (165.53 to 351) | 480916 (322313 to 669290) | 257.01 (171.91 to 358.59) | 0.18 (0.14 to 0.21) |
| Southern Latin America | 30027 (18483 to 44134) | 247.47 (152.84 to 362.62) | 44689 (27665 to 65283) | 246.78 (152.04 to 362.14) | 0.01 (-0.01 to 0.03) |
| Southern Sub-Saharan Africa | 25785 (17078 to 36218) | 215.04 (143.91 to 298.09) | 45975 (30907 to 63777) | 210.8 (141.82 to 291.98) | -0.04 (-0.05 to -0.02) |
| Tropical Latin America | 74646 (50293 to 103442) | 198.43 (134.47 to 272.8) | 126685 (86015 to 172103) | 199.05 (134.82 to 271.53) | 0.02 (0 to 0.04) |
| Western Europe | 211485 (144166 to 292825) | 213.85 (145.53 to 297) | 213924 (145945 to 291357) | 208.66 (141.2 to 287.71) | -0.07 (-0.1 to -0.04) |
| Western Sub-Saharan Africa | 94388 (62049 to 134465) | 245.42 (163.91 to 343.73) | 266315 (174938 to 375887) | 248.2 (165.12 to 345.52) | 0.06 (0.05 to 0.06) |

Abbreviations: EAPC, estimated annual percentage change, SDl, Sociodemographic Index; Ul,uncertainty interval. “ EAPC is expressed as 95% CIs.
